# Supplementary material for: Size Fractionation of Fluorescent Graphene Quantum Dots Using a Cross-Flow Membrane Filtration System
Source: MDPI journal article supplement (doi:10.3390/nano8110959), 2018-11-21
Supplement: s1 [file s1]

## Supplementary materials

# Size Fractionation of Fluorescent Graphene Quantum Dots using a Cross-flow Membrane Filtration System

Sang-Gu Yim, Yong Jin Kim, Ye-Eun Kang, Byung Kee Moon, Eun Sang Jung\* and Seung Yun Yang\*

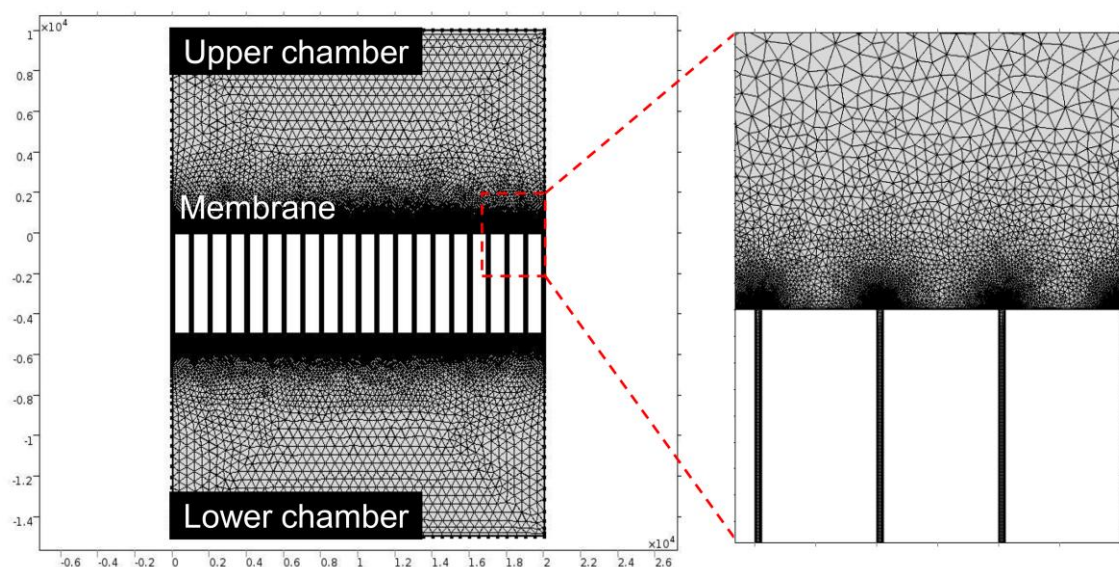

**Figure S1.** Space subdivided by the membrane with nanochannels used in finite element method simulations.

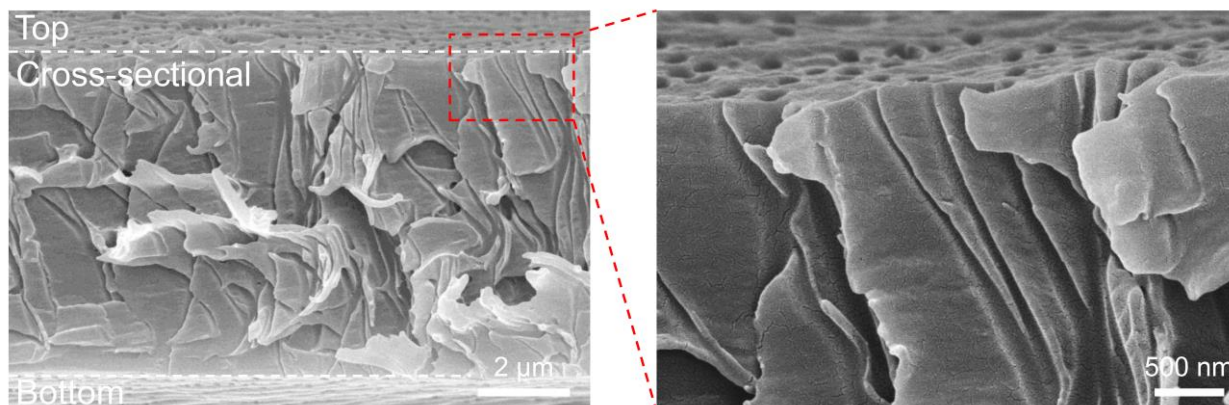

**Figure S2.** SEM images of the cross-sectional image of the membrane before filtration.

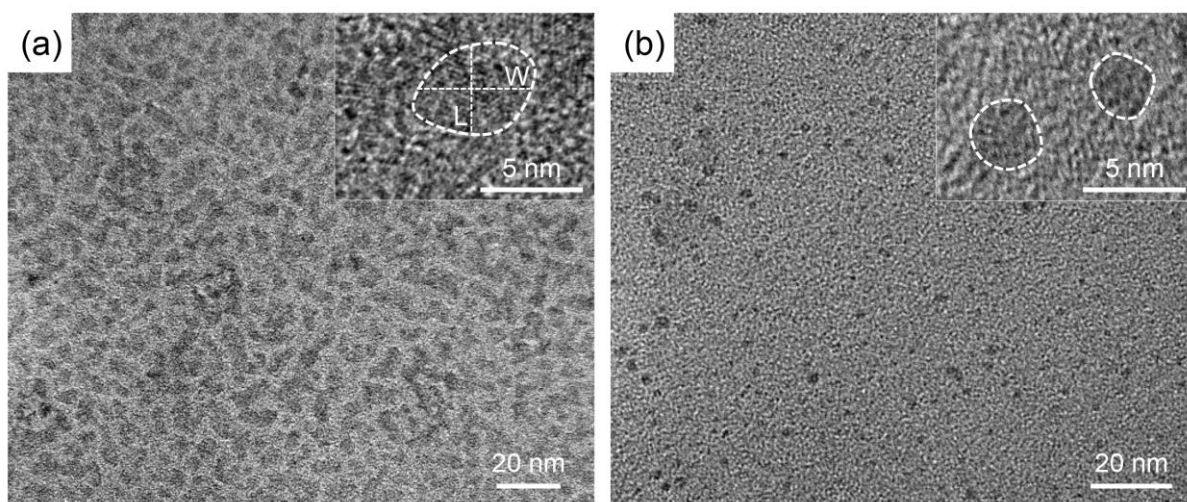

**Figure S3.** TEM images of GQDs in (a) retentate and (b) permeate sides obtained after cross-flow filtration. The average size is defined as half of (width (W) + length (L)) of a GQD as shown in the inset of (a).
